# Supplementary material for: Study on Critical Rainfall for Flash Flood Disasters in Small Watersheds of the Three Gorges Reservoir Area: A Case Study of Futian Small Watershed in Wushan County of Chongqing
Source: Copernicus journal article supplement (doi:10.5194/egusphere-2025-3833), 2025-10-15
Supplement: Supplementary file [file egusphere-2025-3833-AC3-supplement.pdf]

## Response to RC1

Dear Editors and Reviewers:

We would like to express our sincere gratitude to you for sparing your precious time to provide valuable and constructive comments on our manuscript entitled Study on Critical Rainfall for Flash Flood Disasters in Small Watersheds of the Three Gorges Reservoir Area: A Case Study of Futian Small Watershed in Wushan County, Chongqing (Manuscript ID: egusphere-2025-3833). These comments have played a crucial role in improving the quality of our manuscript and optimizing the research design.

We have carefully studied and analyzed all the reviewers' comments one by one, and clearly recognized that the original manuscript has several deficiencies in methodology description, research design rigor, result verification and logical flow. Adhering to the rigorous and realistic scientific research attitude, we have conducted a comprehensive and systematic revision of the manuscript. Below are our point-by-point responses to the reviewers' comments:

### **Comment 1:**

In Section 2.2, the authors present a list of historical disasters... It is not clear whether this list was used solely for event identification and selection or whether it also served as validation for

the model results. For example, “The simulation results of this process are in good agreement with the actual situation...”, the authors state that model results are in good agreement with actual conditions, yet the manuscript does not explicitly describe the evaluation methods or performance metrics used to support this claim.

Response: We highly appreciate your profound insights. The issues you pointed out are indeed major flaws in the original manuscript. We fully agree that the lack of clear validation methods and performance metrics has greatly compromised the reliability of our study.

To address this problem, we have made the following substantial revisions:

Introducing a "calibration-validation" framework: As clearly stated in Section 1.2 (Data Sources and Processing) of the revised manuscript, we divided 19 historical disaster events into 10 calibration events and 9 independent validation events. The calibration events were used to develop the model and determine preliminary thresholds, while the validation events were specifically employed to test the early-warning performance of these thresholds.

Adding a dedicated validation section: A comparative analysis of results derived from four calculation methods has been newly added

in Section 2.3 (Critical Rainfall Recommendation and Validation). We then recommended the critical rainfall and verified it using rainfall data from the 9 validation events. Validation results show that the recommended critical rainfall indicators successfully triggered early warnings for all 9 validation disaster events (i.e., rainfall amount for at least one duration exceeded the threshold), achieving a 100% hit rate. This quantitative result confirms the effectiveness of our method.

Revising vague expressions: Vague qualitative descriptions such as "in good agreement" have been revised in Section 2.1.1. We explicitly acknowledge the lack of measured inundation depth data for quantitative validation, and thus revised the description to "the simulated flood routing process... is basically consistent with post-disaster survey findings". We also emphasize that this is a qualitative validation, intended to illustrate that the model can reasonably reproduce the flash flood characteristics of the watershed rather than achieve precise numerical matching.

## **Comment 2:**

Regarding the modeling approach, the study employs a CN-based hydrological model... a discussion on the accuracy and representativeness of the estimated parameters for the local

characteristics of the case study area is necessary. Furthermore, the manuscript notes that CN values depend on antecedent soil moisture conditions. However... it remains unclear how antecedent humidity conditions were accounted for in the regression analyses.

Response: Thank you for your attention to model parameterization, especially the critical technical detail of antecedent moisture handling. Your comments are highly professional and hit the nail on the head. We have supplemented and clarified this in detail in the revised manuscript as follows:

Adding a new subsection "Model Parameter Settings": In Section 1.3.2, we specifically discuss the sources and rationality of the key parameters of the FloodArea model (hydraulic roughness and SCS-CN values). We explain how these parameters are determined based on land use data and relevant research literature.

Clearly elaborating the handling method of antecedent moisture: Also in Section 1.3.2, we detail how antecedent soil moisture is quantitatively considered. We adopted the standard Antecedent Moisture Condition (AMC) classification method in the SCS-CN model. Specifically, based on the cumulative rainfall in the 5 days prior to each disaster event, we dynamically adjusted the CN value under the standard condition (AMC-II) to the CN value under the dry (AMC-I) or wet (AMC-III) condition. We calculated exclusive

CN spatial distribution maps reflecting the watershed moisture status at that time for each of the 10 flood events used for calibration.

Explaining how antecedent moisture is reflected in the regression: Since each simulation of the FloodArea model uses a specific CN value that reflects the antecedent moisture of that event, the simulated inundation depth results themselves have implicitly included the impact of antecedent moisture. Therefore, the subsequent "rainfall-inundation depth" regression relationship established (Figure 6) is actually built based on 10 sets of "input-output" relationships under different antecedent moisture conditions, thereby comprehensively considering the changes in antecedent moisture.

**Comment 3:**

Additionally, the models are presented as quadratic regression curves, while linear correlation coefficients are reported... which introduces some inconsistency that should be clarified.

Response: We highly appreciate your pointing out this methodological inconsistency. Your criticism is entirely justified, and reporting linear correlation coefficients for nonlinear regression is indeed misleading. We sincerely apologize for this oversight. The following corrections have been made in the revised manuscript:

In Sections 1.3.2 and 2.1.2, we revised the metric for evaluating

the goodness of fit of the regression model from "correlation coefficient" to the more appropriate Coefficient of Determination ( $R^2$ ).  $R^2$  can accurately measure the degree to which the quadratic polynomial regression equation explains the variance of the dependent variable (inundation depth).

We updated the result description in Section 2.1.2 to: "The results show that the coefficients of determination ( $R^2$ ) of the quadratic polynomial regression models for all durations are above 0.7...", which ensures the consistency and scientificity of both the methodology and result reporting.

**Comment 4 & 5:**

Section 3.2, which describes the statistical approaches, would benefit from a clearer explanation of the data structures used for each method... Regarding the Single Station approach, it is also unclear whether using a spatially averaged precipitation series... still qualifies as a "single station" analysis or effectively represents a regionalized dataset.

Response: We sincerely appreciate your incisive comments on the statistical methodology section once again. The descriptions of data structure and method nomenclature in the original manuscript were indeed ambiguous and confusing. We have completely rewritten

Section 1.3.3 (Statistical Analysis Methods) to address these issues:

Clarifying the data structure: We have clearly specified the sample data used for each statistical method.

Multi-station Extremum Averaging Method and Regional Critical Rainfall Method: We explicitly state that these two methods adopt rainfall data from the 10 calibration disaster events.

Probability Distribution Method: The sample dataset consists of the maximum rainfall sequences of different durations, derived from the maximum rainfall amounts recorded at each station across different sliding durations (1h, 2h, ..., 24h) for the 10 calibration events.

Revising method names and definitions: Your query regarding the "single-station method" is entirely valid. It is indeed inappropriate to term the method "single-station" after averaging values from multiple stations. Therefore, we have renamed the original "Single-station Critical Rainfall Method" to Multi-station Extremum Averaging Method, and clearly defined its calculation steps in the method description: first extract the extreme values from all stations for each event, then calculate the average of these extreme values across different events. This ensures full consistency between the method name and its implementation.

Clarifying the data source for the Regional Method: We have

supplemented the description of the Regional Critical Rainfall Method with the statement: "This method only uses rainfall data from recorded disaster events for analysis", so as to eliminate ambiguity.

**Comment 6:**

Finally, in the Probability Distribution Method, the authors assess the goodness of fit of several theoretical distribution functions. Table 5 suggests that this comparison was based on the magnitude of the Kolmogorov–Smirnov (KS) statistic. However, the KS statistic... D-values from different distributions are not directly comparable. More appropriate model comparison criteria... should be used.

Response: We sincerely appreciate this extremely important professional comment on statistics. You are absolutely correct—directly comparing K-S statistic values from different distributions is statistically inappropriate. This was a serious academic error, for which we feel deeply remorseful, and we are grateful to you for helping us correct it. We have adopted your suggestion and made fundamental revisions to this section:

Adopting the AIC criterion: We abandoned the incorrect K-S value comparison in the original manuscript and instead used the academically recognized Akaike Information Criterion (AIC) as the



standard for model selection. A brief introduction to the principle of AIC has been added in Section 1.3.3.

Updating results and figures/tables: We recalculated the AIC values of all distribution functions and replaced the original table with an entirely new Table 5 (Comparison of AIC Values for Goodness of Fit of Different Probability Distribution Functions). The new results clearly show that except for the 1-hour duration, the Generalized Extreme Value (GEV) distribution yields the smallest AIC values for all other durations and is thus selected as the optimal fitting distribution.

This revision not only corrects the error but also significantly improves the scientificity and reliability of our research methodology. We once again express our admiration and gratitude for your rigorous academic spirit.

We would like to express our sincere gratitude again for the valuable comments provided by the reviewers. We look forward to your further review.

Sincerely yours

The Authors

December 24, 2025
